# Supplementary material
Source: Springer Nature journal article supplement (https://www.springermedizin.de/resource/supplementary/12889_2010_2247_MOESM1_ESM.pdf/9485134)

*Questionnaire baseline*

Baseline

Introduction program  
Toolbox 1  
Training physical therapist  
Introduction Rest Break tool

Month 1

Toolbox 2  
Empowerment training

Month 2

*Questionnaire 3 months*

Month 3

Rest Break tool

Toolbox 3  
Training physical therapist

Month 5

Toolbox 4  
Empowerment training  
*Questionnaire 6 months*

Month 6

*Questionnaire 12 months*

Month 12

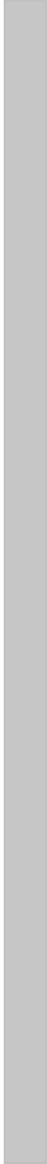

Supplement: MOESM1 [file 9485134]
